# Supplementary material for: Chromatin accessibility complex subunit 1 enhances tumor growth by regulating the oncogenic transcription of YAP in breast and cervical cancer
Source: PeerJ. 2024 Jan 10;12:e16752. doi: 10.7717/peerj.16752 (PMC10787542; doi:10.7717/peerj.16752)
Supplement: Data S1 [file peerj-12-16752-s002.xlsx]

## Sheet: Fig. 2B
Breast cancer				Cervical cancer
number	Tumor	Paratumor		number	Tumor	Paratumor
1	7	2		1	6	6
2				2	7	2
3	6	2		3	6.5	3
4	8	4.5		4	5.5	4
5	4	4		5	3	0.5
6	9	3.5		6	8	2
7				7
8	6.5	3		8	7	2
9	8.5	2		9	5.5	2.5
10	10	4		10	5.5	3
11	11	1		11	9	1
12	11.5	2.5		12	2	0.5
13	12	3.5		13	5	1
14	9.5	3		14	5.5	1
15				15
16	3	3		16	7	4
17	7.5	3		17	7	1.5
18	6	2		18	5.5	0.5
19	8.5	2.5		19
20	10.5	3.5		20	5	2
21	9	4		21	4	2.5
22				22	6	2.5
23	11	1.5		23	7	1.5
24	4	4		24	10	2
25	5	0.5		25	6	4
26	4.5	1.5		26	6.5	2.5
27	5	1		27	7	1.5
28				28	4	0.5
29	11	0.5		29	9.5	4.5
30	12	2.5		30	4	3
31	12	2		31	5	4
32	7.5	2		32	12	1
33	6.5	4.5		33	11	1
34	9.5	4		34	10	2
35	7.5	2.5		35	6.5	3.5
36	5.5	3.5		36	5	2
37				37	5	3
38	9.5	2		38	7	3
39	8.5	3		39	10	8
40	6.5	3.5		40	9	3
41	4.5	2.5		41	12	1.5
42	5.5	1.5		42	6.5	1
43	10	3		43	6	0.5
44	10.5	0.5		44	8.5	3.5
45				45	6.5	2.5
46	12	2		46	7.5	4
47	11	1.5		47	7	2
48	5	0.5		48	6	1.5

## Sheet: Fig. 2G
Breast cancer
number	Stage Ⅰ	Stage Ⅱ	Stage Ⅲ
1	6.5	5.5	8.5
2	8.5
3	7.5	7	10
4	5	6.5	10.5
5	4.5	4	12
6	5.5	6	9
7	4	11	12
8		8.5	9.5
9	9.5	5	11
10	9.5	7.5
11		10
12		11.5
13	5
14		10.5
15		9
16
17		12
18		12
19		3
20		7.5

## Sheet: Fig. 2H
cervical cancer
number	Primary	Metastasis
1	5.5	10
2	7	12
3	6	9
4	11	9
5	6.5	12
6	10	6.5
7	6.5
8	6.5
9
10	6
11	5
12	4
13	3
14	4
15	7.5
16
17	6
18	5.5
19
20	7
21	7
22	10
23	5.5
24	5
25	7
26	7
27	7
28	5
29	5
30	4
31	6
32	5
33	7
34	5.5
35	8
36	5.5
37	6.5
38	8.5
39	6
40	9.5
41	7

## Sheet: Fig. 3B
MDA-MB-231		shNC			1#			2#
	0	0.277247	0.27713	0.277033	0.276952	0.277	0.27719	0.276981	0.277006	0.276995
	24	0.461759	0.436771	0.44504	0.414498	0.402	0.417709	0*	0.464506	0.406103
	48	0.855641	0.850224	0.904379	0.498141	0.492	0.490857	0.70566	0.706019	0.647887
	72	1.632887*	1.8861	1.77569	0.60223	0.591	0.629451	0.895849	0.905093	0.99374
	96	2.35755	2.31031	2.44504	0.731413	0.485*	0.751684	1.06868	0.970679	0.685446*
Hela		shNC			1#			2#
	0	0.39122	0.391081	0.390984	0.391076	0.391115	0.391042	0.391	0.39102	0.391026
	24	0.78439	0.825901	0.824287	0.512686	0.518293	0.561585	0.56	0.54724	0.619048
	48	1.5239	1.35163	1.40294	0.744532	0.762195	0.801034	1.154	1.12722	1.10897
	72	2.42341	2.16552	2.40754	0.894138	1.02004	1.431525*	1.425*	1.35734	1.34524
	96	3.69463	3.28902	3.49218	1.34033	1.52265	1.60121	1.82	1.75117	1.82692

## Sheet: Fig. 3C
MDA-MB-231		shNC	1#	2#
	1	95.903	32.7714	39.8126
	2	100	33.2222	34.4768
	3	101.338	30.3	31.2291
Hela		shNC	1#	2#
	1	96.8729	43.5226	51.076
	2	116.458	39.6904	43.6037
	3	100	41.3333	47.8425

## Sheet: Fig. 3D
MDA-MB-231		shNC	1#	2#
	1	83.3333	40	20
	2	116.667	42.8571	28.5714
	3	133.333	50	25
Hela		shNC	1#	2#
	1	100	21.0526	26.3158
	2	86.8421	18.1818	27.2727
	3	105.263	20	30

## Sheet: Fig. 3F
MDA-MB-231		shNC			1#			2#
	0	0	0	0	0	0	0	0	0	0
	11	1	1	1.25	0	0	0	0	0	0
	14	17.0136	15.2395	11.8501	0	0	0	0	0	0
	17	12.6052	26.9901	16.8892	0	0	0	0	0	0
	20	17.5531	39.7969	13.0727	0	0	0	0	0	0
	23	35.5488	44.6904	14.6261	0	0	0	0	0	0
	26	36.5334	17.7497	50.162	0	0	0	0	0	0
	29	45.2981	64.5157	23.6595	0	0	0	0	0	0
	32	136.654	75.3896	56.1837	0	0	0	0	0	0
	35	301.578	124.7	235.538	0	0	0	0	0	0
	38	430.57	207.94	319.703	0	0	0	0	0	0
	40	752.258	329.577	543.794	0	0	0	0	0	0
Hela		shNC			1#			2#
	0	0	0	0	0	0	0	0	0	0
	5	1	1.25	1.25	0	0	0	0	0	0
	8	31.2478	35.9802	37.3235	0	0	0	0	0	0
	11	77.8687	91.9919	82.7061	0	0	0	0	0	0
	14	146.313	144.489	156.125	0	0	0	0	0	0
	17	225.497	214.361	257.035	0	0	0	0	0	0
	20	332.194	352.439	318.584	0	0	0	0	0	0
	23	458.878	513.962	441.565	6	4.86	0	0	0	0
	26	628.643	565.964	611.983	48.6354	44.0283	8.3479	10.1464	34.9309	11.1835
	29	625.082	782.001	617.891	155.929	114.417	40.2514	123.82	108.088	44.3193
	32	692.942	790.658	818.413	165.528	166.809	68.8403	172.643	212.98	73.4247
	35	849.773	850.606	809.779	263.356	192.382	73.9418	307.326	362.477	82.8255

## Sheet: Fig. 3G
MDA-MB-231		shNC	1#	2#
	1	0.62	0	0
	2	0.88	0	0
	3	0.44	0	0
Hela		shNC	1#	2#
	1	0.78	0.38	0.48
	2	0.81	0.17	0.34
	3	0.73	0.4	0.18

## Sheet: Fig. 3H
Hela		shNC	1#	2#
	1	86.4197	27.7778	34.188
	2	100	37.037	37.037
	3	111.111	37.037	37.037

## Sheet: Fig. 5F
Breast cancer				Cervical cancer
number	YAP	CHRAC1		number	YAP	CHRAC1
1	8	7		1	8	6
2				2	6	7
3	6	6		3	6	6.5
4	7	8		4	5.5	5.5
5	6	4		5	5	3
6	3	9		6	0.5	8
7				7
8	7.5	6.5		8	7	7
9	7	8.5		9	5.5	5.5
10	10.5	10		10	7	5.5
11	10	11		11	7.5	9
12	9	11.5		12	3	2
13	9.5	12		13	6	5
14	10	9.5		14	6.5	5.5
15				15
16	3	3		16	7	7
17	3	7.5		17	6	7
18	8.5	6		18	8	5.5
19	9	8.5		19
20	6.5	10.5		20	7.5	5
21	9	9		21	8.5	4
22				22	11	6
23	10.5	11		23	12	7
24	6.5	4		24	10	10
25	5.5	5		25	6	6
26	6.5	4.5		26	7	6.5
27	3	5		27	8.5	7
28				28	7	4
29	11	11		29	9.5	9.5
30	12	12		30	9	4
31	10.5	12		31	6	5
32	8.5	7.5		32	12	12
33	6.5	6.5		33	11	11
34	7	9.5		34	10	10
35	5	7.5		35	10	6.5
36	9	5.5		36	10	5
37				37	4	5
38	7.5	9.5		38	7	7
39	8	8.5		39	12	10
40	6	6.5		40	9	9
41	4	4.5		41	12	12
42	5	5.5		42	6.5	6.5
43	9	10		43	8	6
44	10.5	10.5		44	8	8.5
45				45	9	6.5
46	11	12		46	7.5	7.5
47	11	11		47	6	7
48	6	5		48	7.5	6

[truncated: 2 more sheets: Supplementary Fig. S3C, Supplementary Fig. S3D]
